# Supplementary material for: High-resolution low-cost LCD 3D printing for microfluidics and organ-on-a-chip devices
Source: Royal Society of Chemistry journal article supplement (doi:10.1039/d3lc01125a), 2024-01-01
Supplement: d3lc01125a1.pdf [file d3lc01125a1.pdf]

Shafique *et al.*

## High-resolution low-cost LCD 3D printing for microfluidics and organ-on-a-chip devices

Houda Shafique<sup>1,2</sup>, Vahid Karamzadeh<sup>1,2</sup>, Geunyoung Kim<sup>1,2</sup>, Molly L. Shen<sup>1,2</sup>, Yonatan Morocz<sup>1,2</sup>, Ahmad Sohrabi-Kashani<sup>1,2</sup>, and David Juncker<sup>1,2</sup> \*

1. Biomedical Engineering Department, McGill University, Montreal, Quebec, Canada
2. McGill Genome Centre, McGill University, Montreal, Quebec, Canada

\* Corresponding Author, Email: [david.juncker@mcgill.ca](mailto:david.juncker@mcgill.ca)

### Supplementary information

#### Supplementary calculations

**Section S1.** Measurement of surface roughness

**Section S2.** Calculation of mixing index

**Section S3.** Calculation of the predicted valve closing pressure

#### Supplementary tables

**Table S1.** Summary of 3D printing settings

**Table S2.** Viscosity of 3D printing inks

**Table S3.** Summary of Taguchi Design of Experiments assay results

**Table S4.** Analysis of variance and percent contribution from Taguchi Design of Experiments

**Table S5.** ELISA-chip cost breakdown using PLInk and assay reagents

**Table S6.** OoC device cost breakdown using PLInk

#### Supplementary figures

**Figure S1.** UV-Vis spectra

**Figure S2.** FTIR-ATR spectra

**Figure S3.** Cure depth as a function of the energy dose

**Figure S4.** Surface roughness of 3D-printed parts using PLInk

**Figure S5.** Open channel 3D printing

**Figure S6.** Rectangular channel 3D printing

**Figure S7.** Circular channel 3D printing

**Figure S8.** *In situ* membrane 3D printing

**Figure S9.** Fluorescent images of microfluidic mixing at different volumetric flow rates

**Figure S10.** Mixing indices

**Figure S11.** Tensile testing of 3D-printed parts using PLInk

**Figure S12.** Contact angle

**Figure S13.** Nitrocellulose membranes from LCD 3D printed ELISA-chip for IFN- $\gamma$  detection

**Figure S14.** 384-well plate OoCs

**Figure S15.** Cell seeding of OoC devices

**Figure S16.** Cellular migration and reorganization after 5 days in the OoC device

### **Supplementary videos**

**Video S1.**  $\mu$ CT scan of microvalve

**Video S2.** LCD 3D printed ELISA-chip

## Supplementary calculations

### Section S1. Measurement of surface roughness

The surface roughness of a 3D printed part was measured using profilometry according to the ISO 4287 and 4288 standards. Sample prints that were  $25 \times 75 \times 2 \text{ mm}^3$  (width  $\times$  length  $\times$  height) were assessed for surface roughness. The mean surface roughness is given by the average distance between the mean line and all the data points over a minimum sampling length of 0.8 mm; the surface roughness ( $R_a$ ) is calculated as follows:

$$R_a = \frac{1}{n} \sum_{i=1}^n |y_i| \quad (\text{Equation S1})$$

where  $y$  denotes all the sampled points, and  $n$  denotes the number of sampled points that are iterated over an increment  $i$ . Over three unique sampling lengths, the average surface roughness of PLink on the low-cost 3D printers was  $530 \pm 110 \text{ nm}$  (**Figure S4**).

### Section S2. Calculation of mixing index

The mixing efficiency was assessed by measuring the fluorescent intensity of a pre-mixed solution versus a solution mixed in the microchannels. The captured images of the mixed solutions were analyzed in ImageJ by taking the fluorescent intensity readout over the length of the channel outlet. For all the flow rates and the given channel geometry, we calculated the corresponding relative mixing index (RMI) as a metric for efficiency as follows:

$$RMI = \left[ 1 - \frac{\sigma}{\sigma_0} \right] \times 100\% = \left[ 1 - \frac{\sqrt{\frac{\sum_{i=1}^n (x_i - x_{avg})^2}{n}}}{\sqrt{\frac{\sum_{i=1}^n (x_{0i} - x_{avg})^2}{n}}} \right] \times 100\% \quad (\text{Equation S2})$$

where  $\sigma$  and  $\sigma_0$  are the STDs of the fluorescent intensities,  $x_i$  is the normalized intensity at point  $i$  at the outlet,  $x_{0i}$  is the normalized intensity at point  $i$  at the inlet,  $x_{avg}$  is the normalized intensity for a completely mixed solution, and  $n$  denotes the number of points sampled. With this metric,  $RMI = 100\%$  represents a state with complete mixing while  $RMI = 0\%$  represents a state with no mixing.

### Section S3. Calculation of the predicted valve closing pressure

Based on known valve dimensions and known material properties, we can estimate the pressure required to deflect the membrane and make contact with the valve seat to subsequently close the valve. For the valve we present here, the predicted valve closing pressure ( $P$ ) can be calculated as follows:<sup>1</sup>

Shafique *et al.*

$$P_{closing} = \left( \frac{5.33}{1 - \nu^2} \left( \frac{y}{t} \right) + \frac{2.6}{1 - \nu^2} \left( \frac{y}{t} \right)^3 \right) \left( \frac{Et^4}{r^4} \right) \quad (\text{Equation S3})$$

where  $E$  is the Young's modulus ( $\sim 68$  MPa),  $\nu$  is the Poisson ratio ( $\sim 0.9$ ),  $r$  is the membrane radius ( $\sim 1.05$  mm),  $t$  is the membrane thickness ( $\sim 43$   $\mu\text{m}$ ), and  $y$  is the gap height that the membrane must deflect ( $\sim 100$   $\mu\text{m}$ ). This yields a pressure of  $\sim 45$  kPa to close the valve, which is in good agreement with the physical experiment.

## Supplementary tables

Table S1. Summary of 3D printing settings.

|                                       | Calibration devices (Figure S5-7) | Calibration devices (Figure S8) | Microfluidic mixer (Figure 3) | Membrane microvalve (Figure 4) | ELISA-chip (Figure 5)     | OoC device and 384-well plate (Figure 6) | Stacked OoC devices (Figure 6) |
|---------------------------------------|-----------------------------------|---------------------------------|-------------------------------|--------------------------------|---------------------------|------------------------------------------|--------------------------------|
| Printer (ELEGOO)                      | Mars 3 Pro 4K                     | Mars 4 Ultra 9K                 | Mars 3 Pro 4K                 | Saturn 2 8K                    | Mars 3 Pro 4K             | Saturn 3 Ultra 12K                       | Saturn 3 Ultra 12K             |
| Device dimensions [mm <sup>3</sup> ]  | ~26.5 × 4.4 × 3.0                 | 16.9 × 4.6 × 2.0                | 45.1 × 9.8 × 1.5              | 42.0 × 42.0 × 2.0              | 88.7 × 27.3 × 2.8         | 8.5 × 4.0 × 7.0                          | 8.5 × 4.0 × 7.0                |
| Light engine*                         | 36 COB LED + Fresnel lens         | 36 COB LED + Fresnel lens       | 36 COB LED + Fresnel lens     | 48 COB LED + Fresnel lens      | 36 COB LED + Fresnel lens | COB LED + refractive lens                | COB LED + refractive lens      |
| Light uniformity and angle*           | 92%                               | 92%, <5°                        | 92%                           | Not reported                   | 92%                       | Not reported                             | Not reported                   |
| Pixel size [μm <sup>2</sup> ]*        | 35 × 35                           | 18 × 18                         | 35 × 35                       | 28.5 × 28.5                    | 35 × 35                   | 19 × 24                                  | 19 × 24                        |
| Pixel number [pixels]*                | 4098 × 2560 ≅ 10M                 | 8520 × 4320 ≅ 36M               | 4098 × 2560 ≅ 10M             | 7680 × 4320 ≅ 33M              | 4098 × 2560 ≅ 10M         | 11520 × 5120 ≅ 58M                       | 11520 × 5120 ≅ 58M             |
| Build volume [mm <sup>3</sup> ]*      | 143 × 89.6 × 175                  | 153.4 × 77.8 × 175              | 143 × 89.6 × 175              | 219 × 123 × 250                | 143 × 89.6 × 175          | 219 × 123 × 260                          | 219 × 123 × 260                |
| Layer height [mm]                     | 0.020                             | 0.020                           | 0.020                         | 0.020                          | 0.020                     | 0.020                                    | 0.050                          |
| Exposure time [s]                     | 1.3                               | 1.3                             | 1.6                           | 1.5                            | 1.8                       | 1.5                                      | 3.5                            |
| Bottom exposure time [s]              | 7                                 | 7                               | 10                            | 10                             | 7                         | 10                                       | 10                             |
| Rest time [s]                         | 3                                 | 3                               | 3                             | 3                              | 5                         | 4                                        | 3                              |
| Lifting speed [mm min <sup>-1</sup> ] | 50                                | 50                              | 30                            | 65                             | 50                        | 65                                       | 40                             |
| Retract speed [mm min <sup>-1</sup> ] | 210                               | 210                             | 60                            | 80                             | 210                       | 210                                      | 300                            |
| Anti-aliasing                         | Yes                               | Yes                             | Yes                           | Yes                            | No                        | Yes                                      | Yes                            |
| Total print time [min]                | ~51                               | ~51                             | ~39                           | ~31                            | ~42                       | ~86                                      | ~486                           |

Chip-on-board LEDs are called COB. \* indicates manufacturer information taken from their website at <https://www.elegoo.com>.

**Table S2.** Viscosity of 3D printing inks

| <b>Ink</b>                                    | <b>Viscosity [mPa s]*</b> |
|-----------------------------------------------|---------------------------|
| PLInk containing 0% PETTA crosslinker         | 16.2                      |
| PLInk containing 0.5% PETTA crosslinker       | 15.8                      |
| PLInk containing 1% PETTA crosslinker         | 15.0                      |
| PLInk containing 2% PETTA crosslinker         | 15.6                      |
| <i>Anycubic upgraded ABS-like clear resin</i> | 224                       |
| <i>Monocure 3D crystal clear resin</i>        | 551                       |
| <i>Luvantix 3DMaterials clear resin</i>       | 528                       |

\* viscosity was measured at 21°C

**Table S3.** Summary of Taguchi Design of Experiments assay results

|   | <b>Capture antibody<br/>[<math>\mu\text{g mL}^{-1}</math>]</b> | <b>Detection antibody<br/>[<math>\mu\text{g mL}^{-1}</math>]</b> | <b>pHRP [<math>\mu\text{g mL}^{-1}</math>]</b> | <b>Relative signal<br/>intensity [0-1]</b> |
|---|----------------------------------------------------------------|------------------------------------------------------------------|------------------------------------------------|--------------------------------------------|
| 1 | 50                                                             | 1                                                                | 1                                              | 0.42                                       |
| 2 | 50                                                             | 5                                                                | 5                                              | 0.59                                       |
| 3 | 50                                                             | 25                                                               | 25                                             | 0.63                                       |
| 4 | 100                                                            | 1                                                                | 5                                              | 0.55                                       |
| 5 | 100                                                            | 5                                                                | 25                                             | 0.63                                       |
| 6 | 100                                                            | 25                                                               | 1                                              | 0.51                                       |
| 7 | 200                                                            | 1                                                                | 25                                             | 0.61                                       |
| 8 | 200                                                            | 5                                                                | 1                                              | 0.59                                       |
| 9 | 200                                                            | 25                                                               | 5                                              | 0.67                                       |

**Table S4.** Analysis of variance and percent contribution from Taguchi Design of Experiments

| Source | Degree of freedom | Sum of squares | F ratio | p-value | Contribution |
|--------|-------------------|----------------|---------|---------|--------------|
| pHRP   | 2                 | 114.3          | 18.9    | 0.050   | 25%          |
| dAb    | 2                 | 104.5          | 12.4    | 0.054   | 24%          |
| cAb    | 2                 | 200.0          | 33.3    | 0.029*  | 47%          |

\* for significance level  $\alpha=0.05$

See Luo *et al.*<sup>2</sup> for more details.

**Table S5.** ELISA-chip cost breakdown using PLInk and assay reagents

| Category | Item                                                           | Vendor                  | Price [USD] | Quantity                                    | Cost per chip [USD] |
|----------|----------------------------------------------------------------|-------------------------|-------------|---------------------------------------------|---------------------|
| Ink      | PEGDA-250                                                      | Sigma-Aldrich           | \$142       | 500 mL                                      | \$2.15              |
|          | ITX                                                            | Fisher Scientific       | \$205       | 25 g                                        | \$0.03              |
|          | TPO                                                            | Sigma-Aldrich           | \$159       | 50 g                                        | \$0.01              |
|          | PETTA                                                          | Sigma-Aldrich           | \$110       | 250 mL                                      | \$0.04              |
| Assembly | Nitrocellulose                                                 | Pall Corporation        | \$40        | 25 mm × 3 m                                 | \$0.02              |
|          | Cover layer                                                    | 3M                      | \$320       | 152 mm × 23 m                               | \$0.24              |
|          | Absorbent pad                                                  | Ahlstrom-Munksjö        | \$85        | 200 × 200 mm <sup>2</sup>                   | \$0.02              |
| Assay    | Mouse anti-human IFN- $\gamma$ capture antibody                | R&D Systems             | \$489       | 200 $\mu$ L at 500 $\mu$ g mL <sup>-1</sup> | \$0.34              |
|          | Biotinylated mouse anti-human IFN- $\gamma$ detection antibody | R&D Systems             | \$701       | 250 $\mu$ L at 200 $\mu$ g mL <sup>-1</sup> | \$0.63              |
|          | Streptavidin-pHRP                                              | ThermoFisher Scientific | \$400       | 500 $\mu$ L at 500 $\mu$ g mL <sup>-1</sup> | \$0.36              |
|          | DAB substrate                                                  | Sigma-Aldrich           | \$213       | 50 tablets at 5 mL per reaction             | \$0.04              |
|          | BSA-biotin                                                     | Sigma-Aldrich           | \$147       | 1 mL at 10 mg mL <sup>-1</sup>              | \$0.01              |
| Total    |                                                                |                         |             |                                             | \$3.89              |

**Table S6.** OoC device cost breakdown using PLInk

| Item      | Vendor            | Price [USD] | Quantity | Cost per chip [USD]                                                                     |                                                                                     |
|-----------|-------------------|-------------|----------|-----------------------------------------------------------------------------------------|-------------------------------------------------------------------------------------|
|           |                   |             |          | Individual OoC device ( $8.9 \times 4.5 \times 7 \text{ mm}^3 \cong 0.17 \text{ mL}$ )* | 384-well plate OoC ( $128 \times 85 \times 7.5 \text{ mm}^3 \cong 50 \text{ mL}$ )* |
| PEGDA-250 | Sigma-Aldrich     | \$142       | 500 mL   | \$0.07                                                                                  | \$21.50                                                                             |
| ITX       | Fisher Scientific | \$205       | 25 g     | \$0.01                                                                                  | \$0.30                                                                              |
| TPO       | Sigma-Aldrich     | \$159       | 50 g     | \$0.01                                                                                  | \$0.10                                                                              |
| PETTA     | Sigma-Aldrich     | \$110       | 250 mL   | \$0.01                                                                                  | \$0.40                                                                              |
| Total     |                   |             |          | \$0.10                                                                                  | \$22.30                                                                             |

\* indicates the volume of the printed block minus the volume of the voids



## Supplementary figures

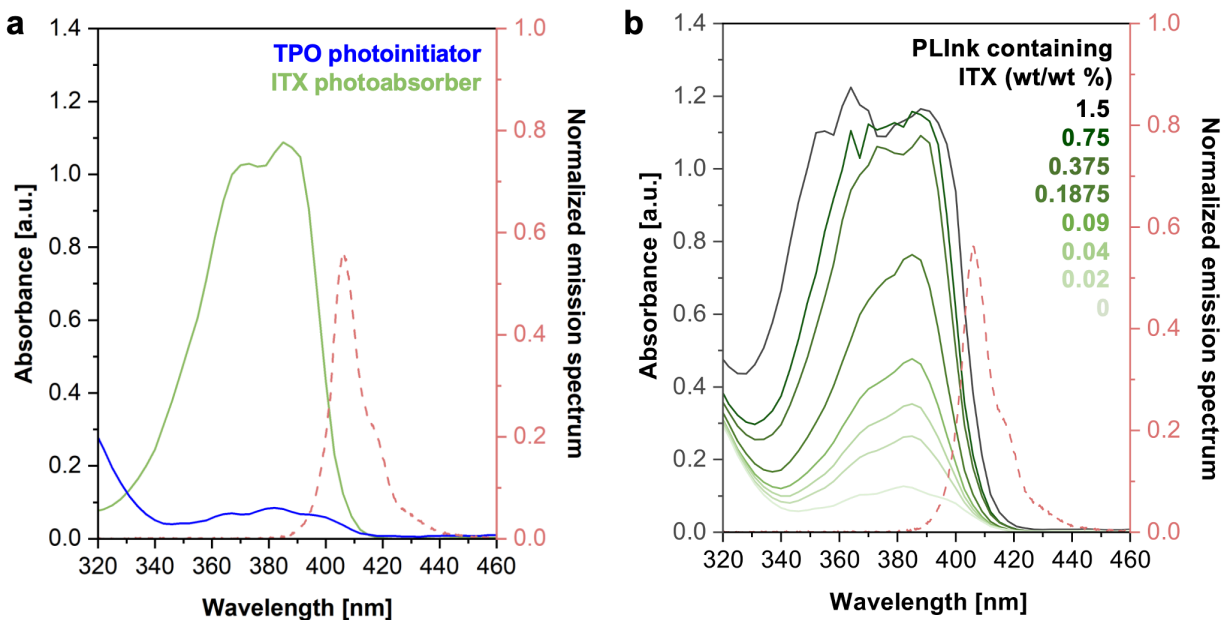

**Figure S1. UV-Vis spectra.** (a) UV-Vis spectrum of TPO photoinitiator and ITX photoabsorber dissolved in PEGDA-250 (left y-axis) compared to the LCD 3D printer emission spectrum (red dashed line, right y-axis). (b) PLInk UV-Vis spectra formulated with a varying concentration of ITX from 0-1.5% wt/wt showing that higher ITX concentration increased the absorbance at the illumination wavelength of 3D printer (i.e., ~405 nm).

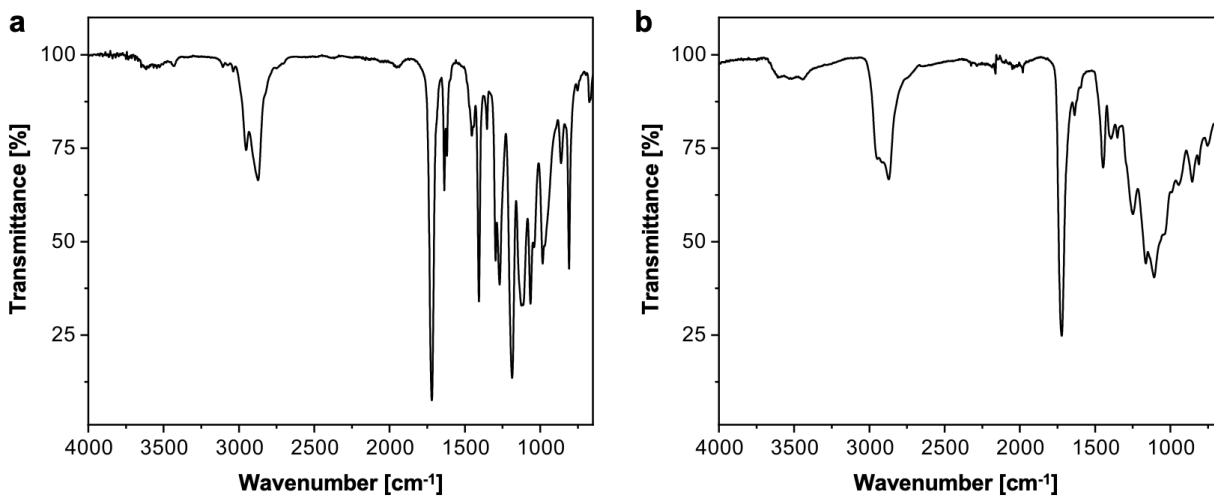

**Figure S2. FTIR-ATR spectra.** Functional group characterization using FTIR-ATR of the (a) uncured precursor PLInk and (b) cured PLInk following 405 nm UV exposure.

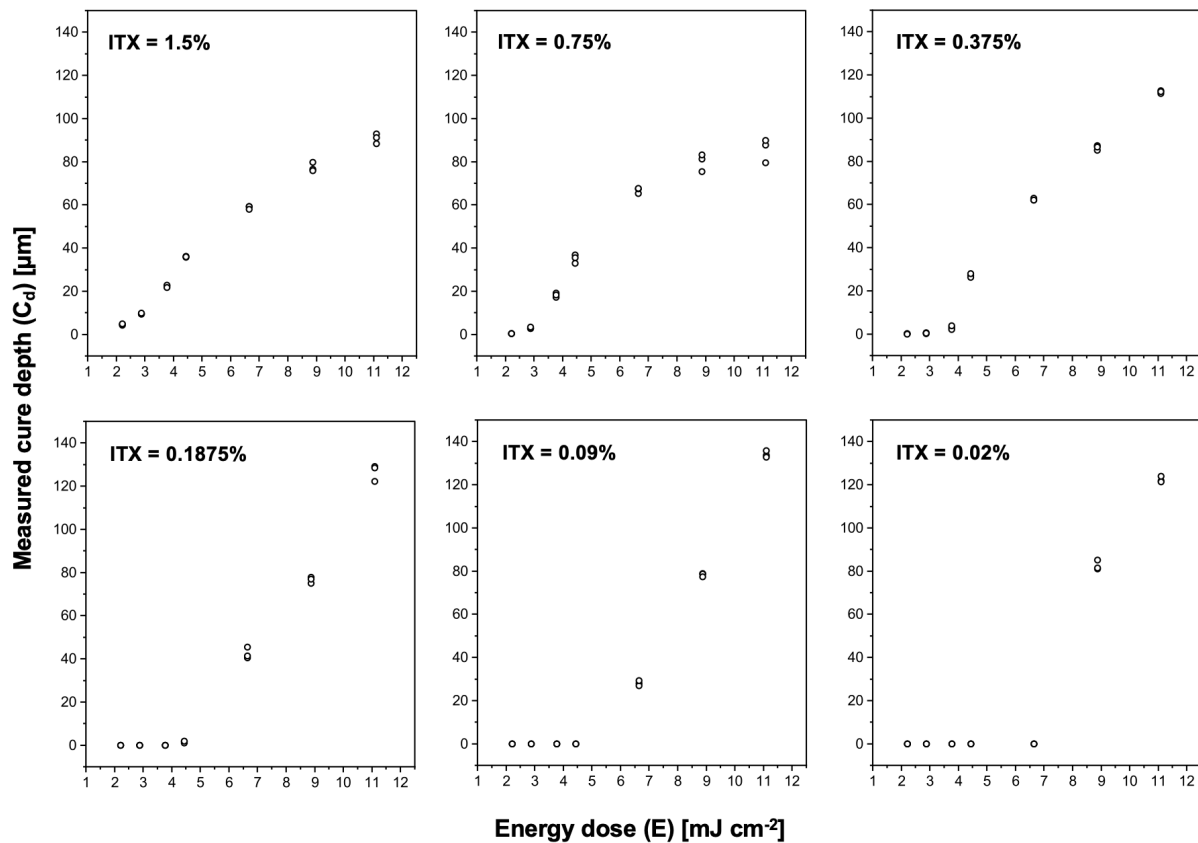

**Figure S3.** Cure depth as a function of the energy dose, for different concentrations of ITX to determine the penetration depth of light for PLInk. Data shows mean  $\pm$  STD across three replicates and was acquired using the Elegoo Mars 3 Pro 3D printer.

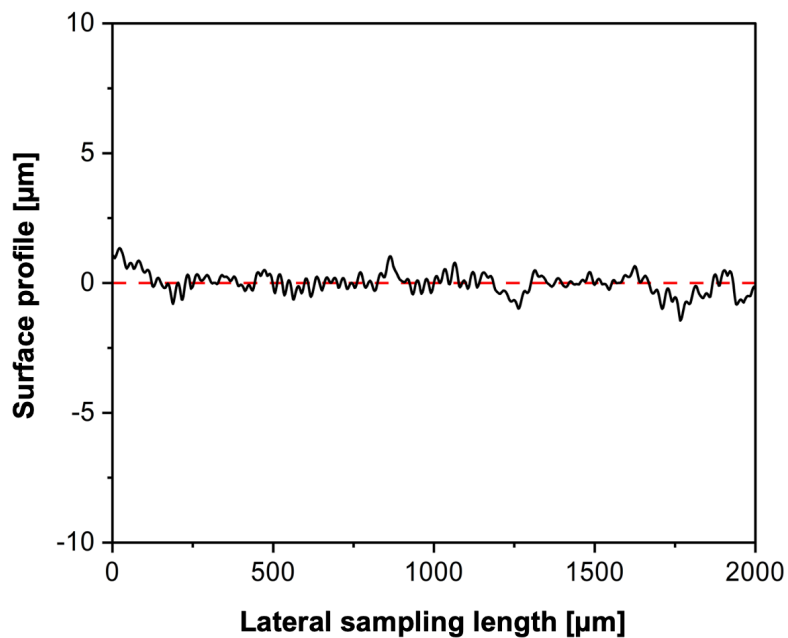

**Figure S4. Surface roughness of 3D printed parts using PLInk.** Surface topography given along a 12.5  $\mu\text{m}$  line width using a stylus profilometer to calculate a mean surface roughness of  $530 \pm 110$  nm across three replicates. Data was acquired using the Elegoo Mars 3 Pro 3D printer.

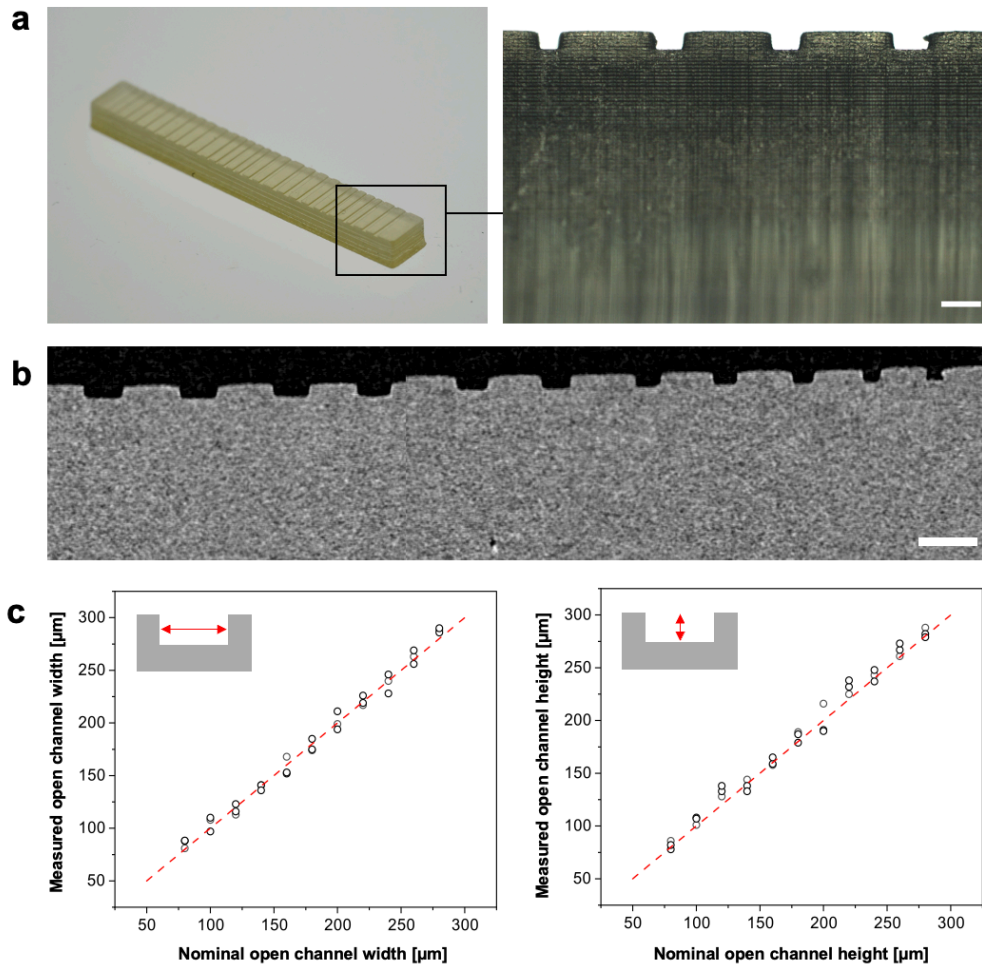

**Figure S5. Open channel 3D printing.** (a) Open channel calibrator device showing varying channel dimensions to assess the resolution, inset shows  $\sim 75 \times 75 \mu\text{m}^2$  open channel at the surface of the device. Scale bar =  $200 \mu\text{m}$ . (b)  $\mu\text{CT}$  side view of the open channel calibrator device. Scale bar =  $500 \mu\text{m}$ . (c) Dimensional accuracy between design file and printed channel widths and depths across three unique devices. Dashed line shows the case where the nominal value = measured value.

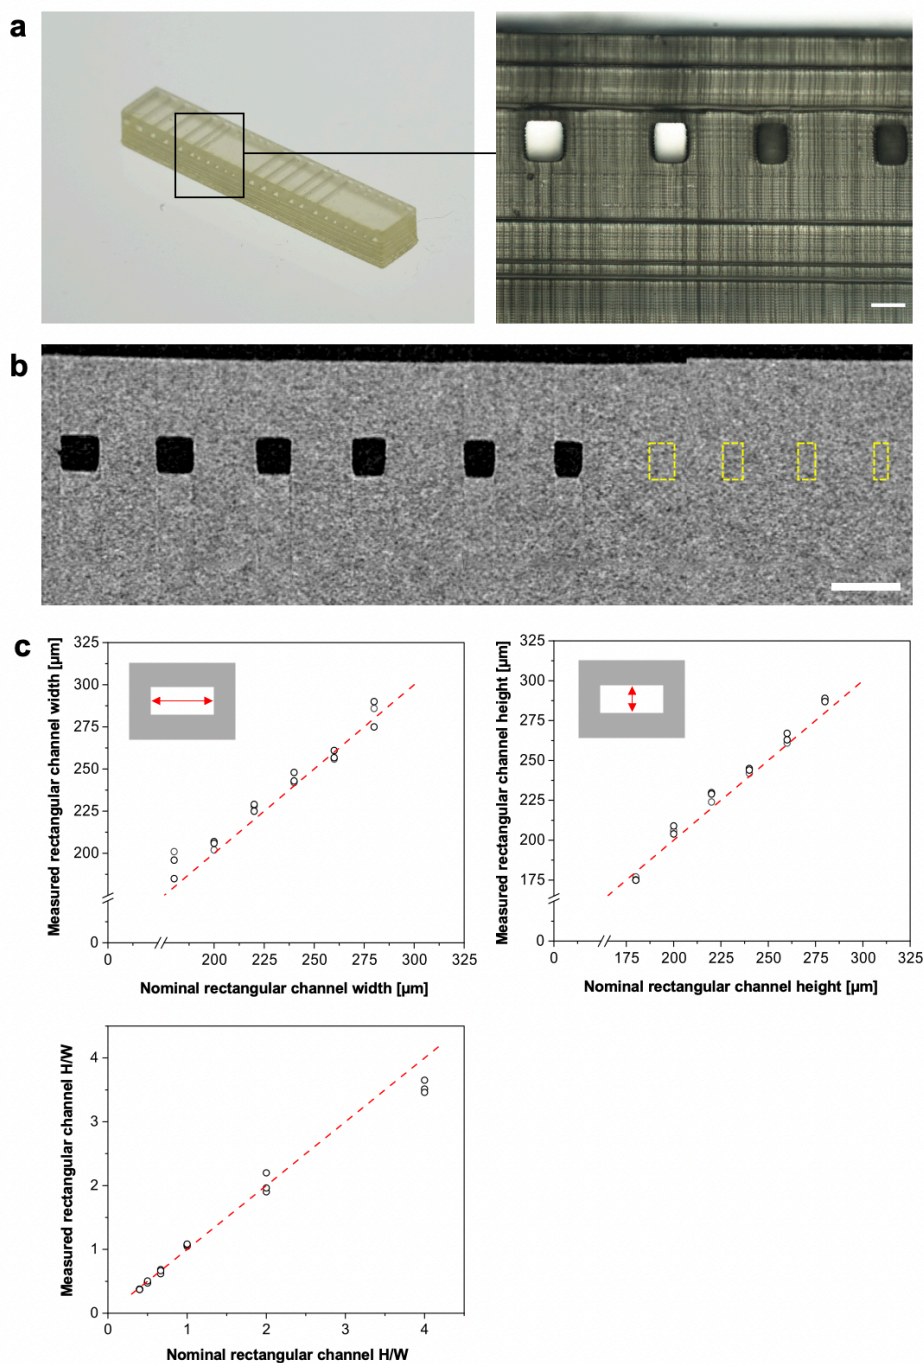

**Figure S6. Rectangular channel 3D printing.** (a) Rectangular channel calibrator device showing varying channel dimensions to assess the resolution, inset shows  $\sim 170 \times 220 \mu\text{m}^2$  rectangular channel embedded into the device. Scale bar =  $200 \mu\text{m}$ . (b)  $\mu\text{CT}$  side view of the rectangular channel calibrator device showing clogged channels in yellow dashed outlines. Scale bar =  $500 \mu\text{m}$ . (c) Dimensional accuracy between design file and printed channel widths and depths across three unique devices; aspect ratio dimensional accuracy is given as the height (H) divided by width (W) of rectangular microchannels. Dashed line shows the case where the nominal value = measured value.

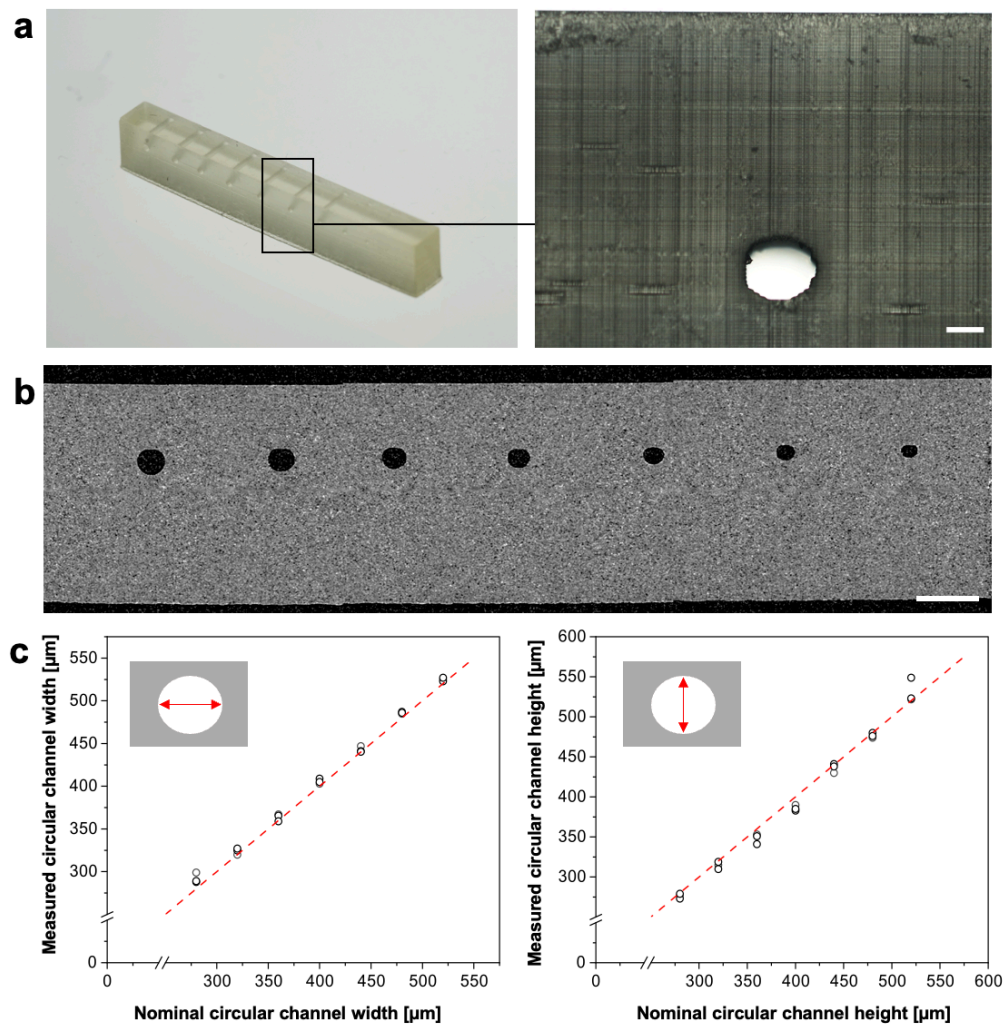

**Figure S7. Circular channel 3D printing.** (a) Circular channel calibrator device showing varying channel diameters to assess the resolution, inset shows a  $\sim 125 \mu\text{m}$  radius embedded channel. Scale bar =  $200 \mu\text{m}$ . (b)  $\mu\text{CT}$  side view of circular channel calibrator device. Scale bar =  $1 \text{ mm}$ . (c) Dimensional accuracy between design file and printed channel widths and depths across three unique devices. Dashed line shows the case where the nominal value = measured value.

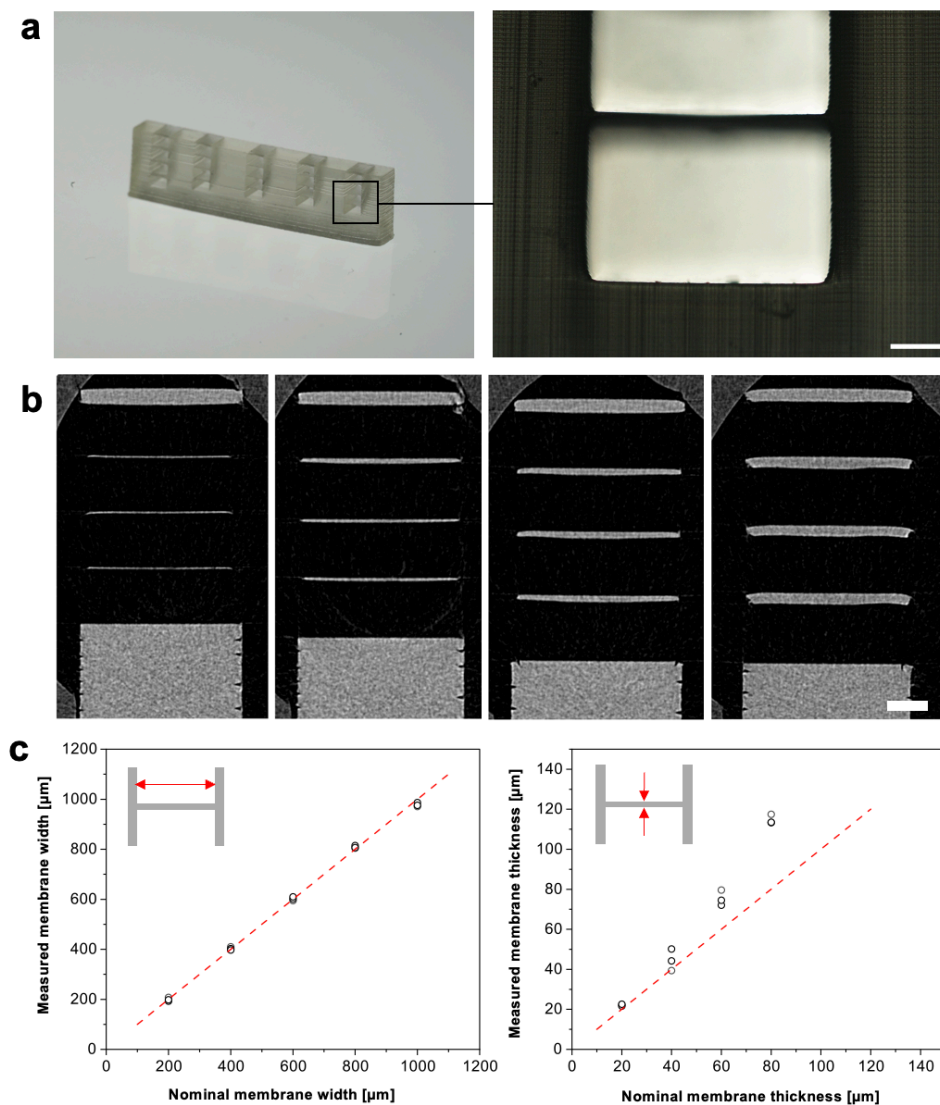

**Figure S8. *In situ* membrane 3D printing.** (a) Membrane calibrator device showing varying membrane thicknesses to assess the z-resolution, inset shows a 20 μm membrane. Scale bar = 200 μm. (b) μCT side views of 20, 40, 60, and 80 μm thick membranes. Scale bar = 500 μm. (c) Dimensional accuracy between design file and printed membrane widths and thickness across three unique devices. Dashed line shows the case where the nominal value = measured value.



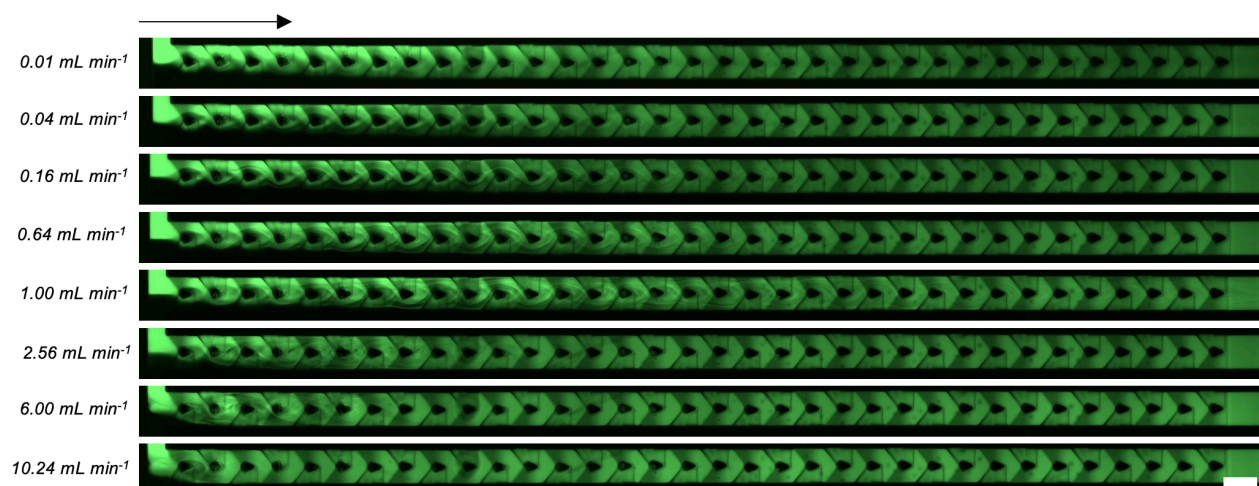

**Figure S9. Fluorescent images of microfluidic mixing at different volumetric flow rates.** Deionized water and 10  $\mu\text{M}$  fluorescein solution were mixed over a range of flow rates from 0.01-10.24  $\text{mL min}^{-1}$  via fluorescence microscopy along the length of the channel. Arrow shows the direction of flow. Scale bar = 1 mm.

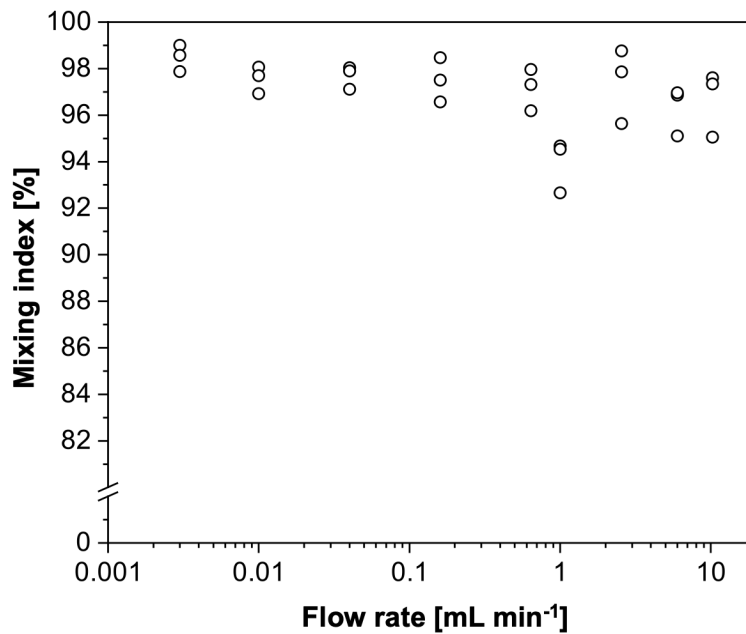

**Figure S10. Mixing indices**, shown for the mixing of 10  $\mu$ M fluorescein and deionized water at different flow rates for three replicate micromixer devices.

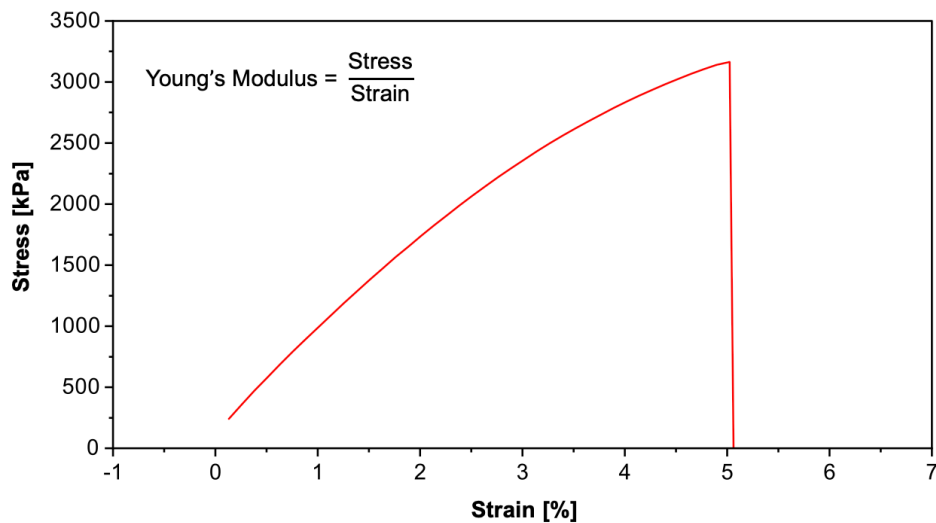

**Figure S11. Tensile testing of 3D printed parts using PLInk.** Application of a known load and observation of the measured extension gives a Young's modulus of  $68 \pm 3$  MPa across three replicates.

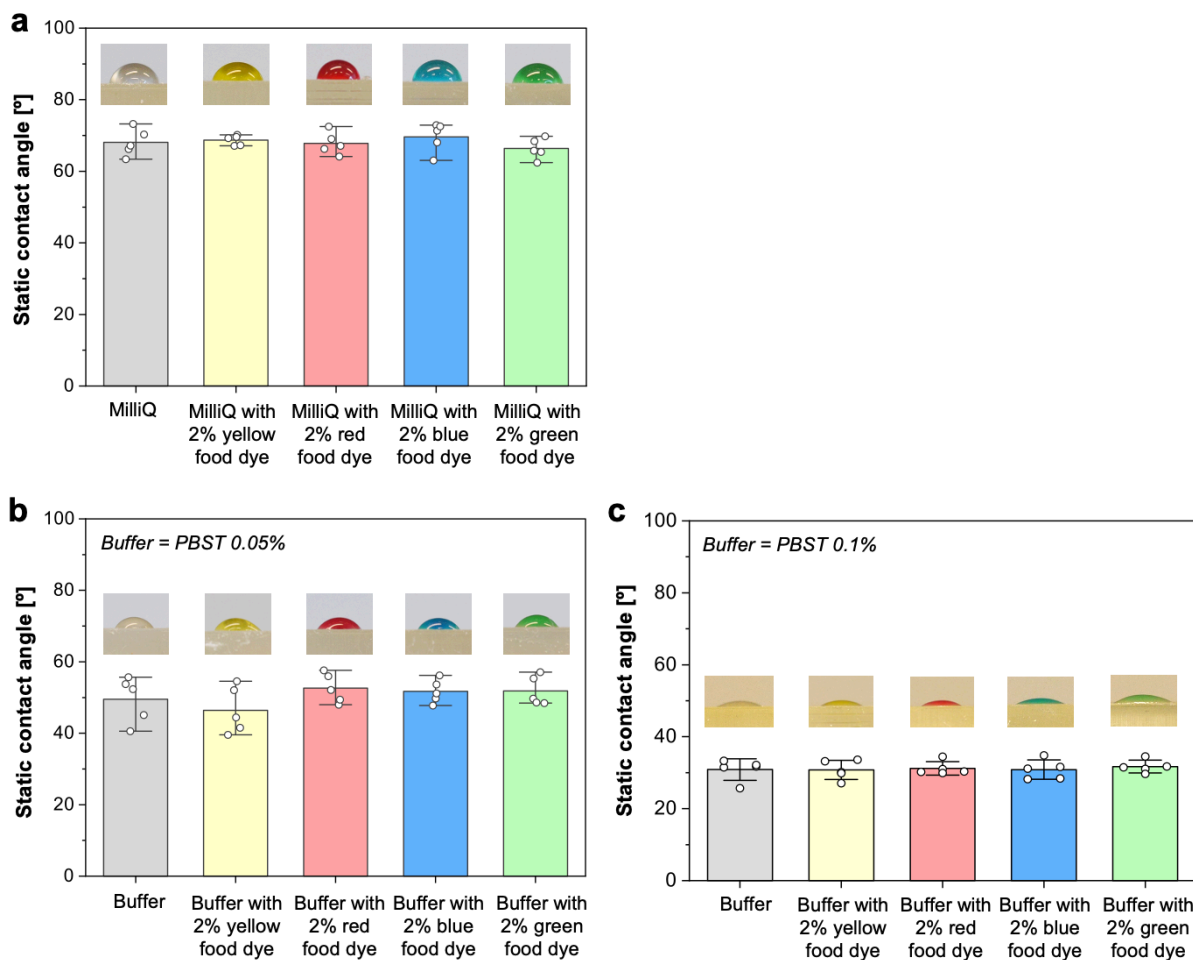

**Figure S12. Contact angle.** Contact angle of (a) water, (b) PBST 0.05%, and (c) PBST 0.1% ELISA buffer on 3D printed PLInk. Data shows mean  $\pm$  STD across five replicates. Notably, this ink is inherently more hydrophilic than most commercial counterparts that we previously used for capillaries.<sup>3, 4</sup>

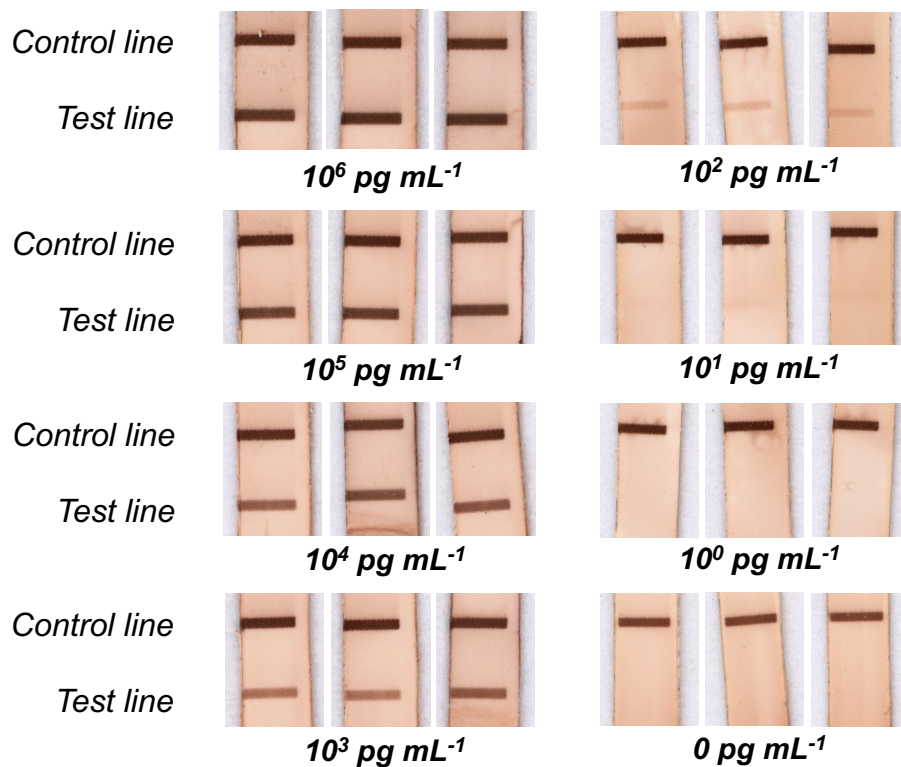

**Figure S13. Nitrocellulose membranes from LCD 3D printed ELISA-chip for IFN- $\gamma$  detection.** Colorimetric readouts on a nitrocellulose membrane showing a control line and test line at various IFN- $\gamma$  concentrations.

OoC 384-well plate #1

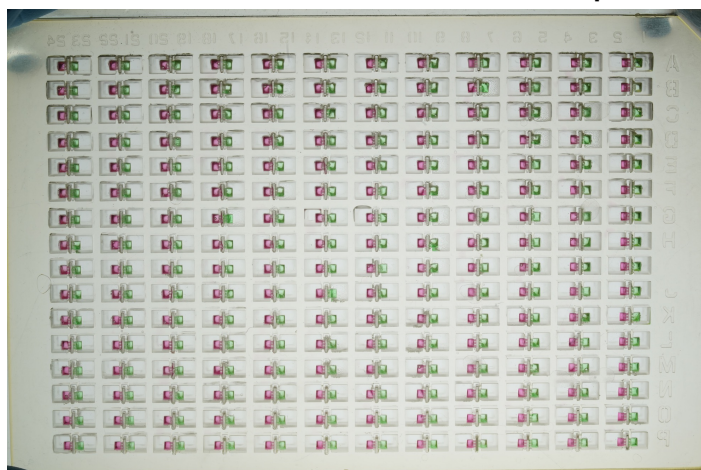

OoC 384-well plate #2

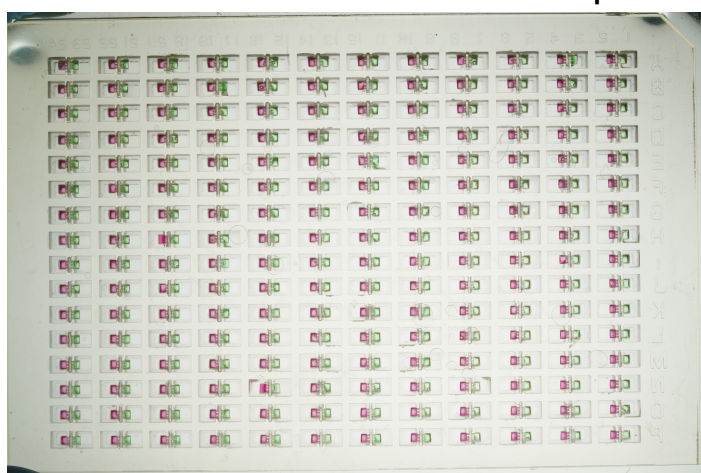

OoC 384-well plate #3

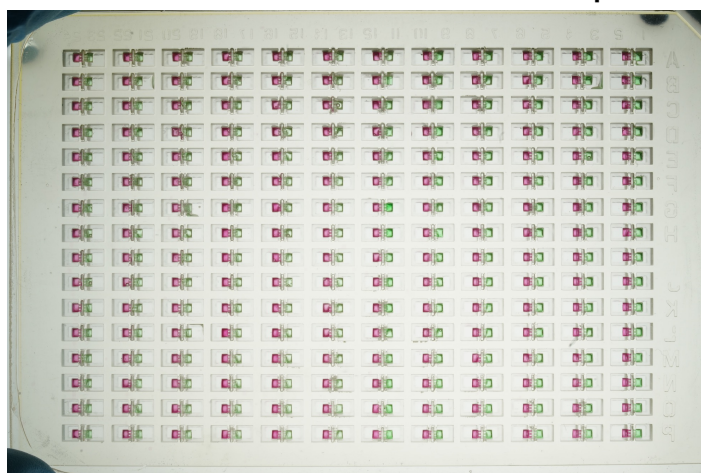

**Figure S14. 384-well plate OoCs.** Loading of red and green dyed gel solutions into the 384-well plate format OoC devices printed in 1.5 h using the Elegoo Saturn 3 Ultra with a nominal pixel size of  $19 \times 24 \mu\text{m}^2$  and  $>58\text{M}$  pixels. Across three uniquely 3D printed well plates, we observe a 100% yield on fluidic performance of the embedded multi-layer stop valves.

3D printed OoC #1

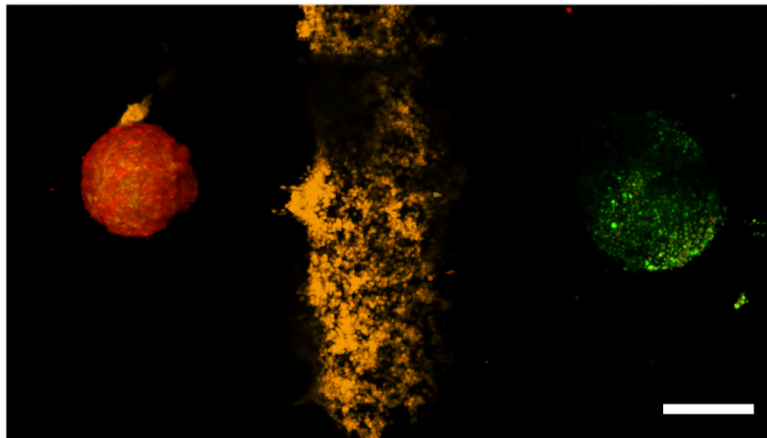

3D printed OoC #2

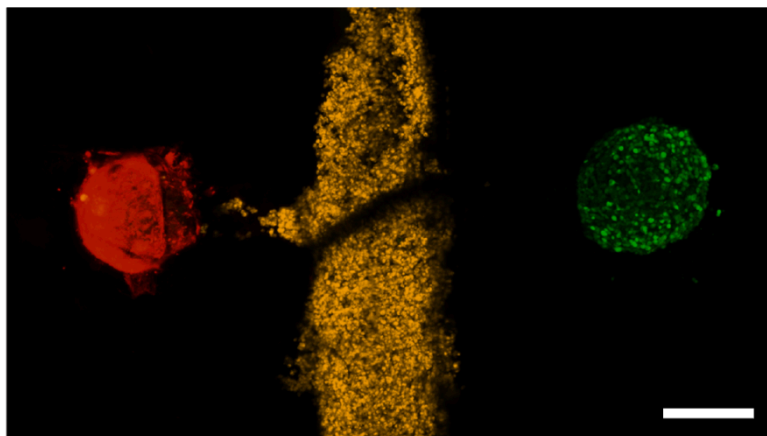

3D printed OoC #3

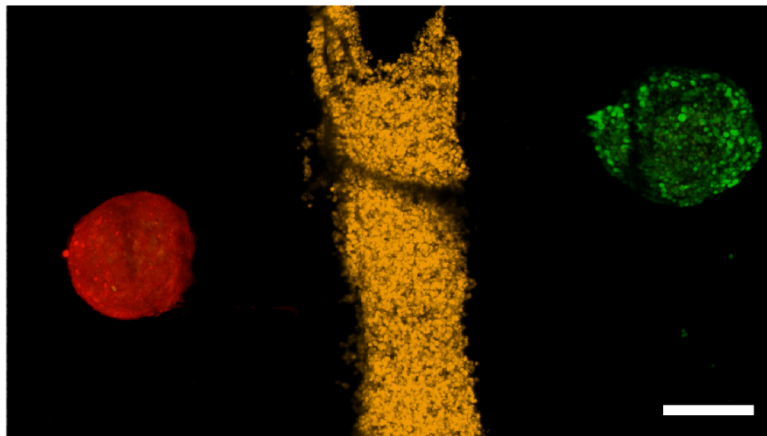

**Figure S15. Cell seeding of OoC devices.** Three individual OoC devices seeded with breast cancer spheroid (green), lung spheroid (red) and the middle chamber seeded with endothelial cells (orange) that form a vascular barrier.

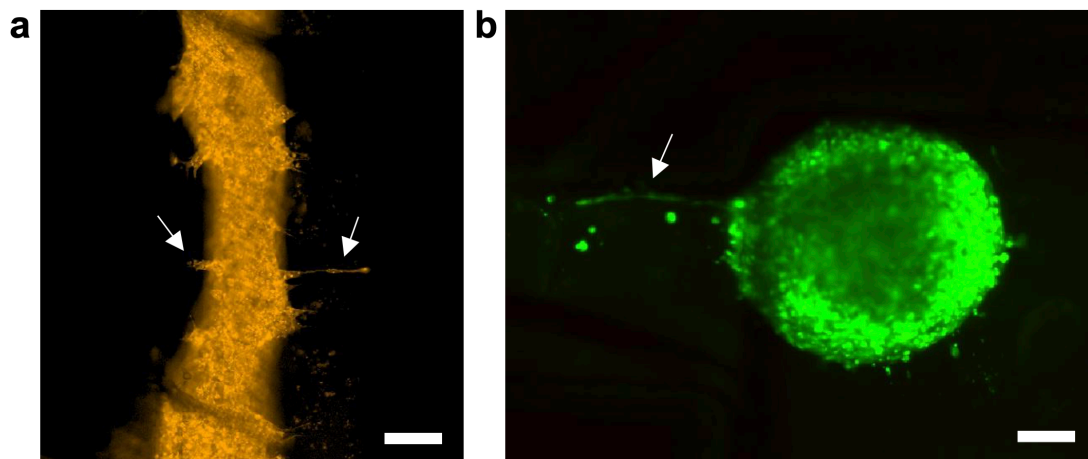

**Figure S16. Cellular migration and reorganization after 5 days in the OoC device.** (a) Endothelial cell tightening and sprouting of single cells towards the spheroid chambers. (b) Breast cancer spheroid showing initial cell migration towards the endothelial central chamber. Scale bars = 100  $\mu\text{m}$ .

#### References:

1. Y.-S. Lee, N. Bhattacharjee and A. Folch, *Lab on a Chip*, 2018, **18**, 1207-1214.
2. W. Luo, M. Pla-Roca and D. Juncker, *Analytical Chemistry*, 2011, **83**, 5767-5774.
3. M. Yafia, O. Ymbern, A. O. Olanrewaju, A. Parandakh, A. Sohrabi Kashani, J. Renault, Z. Jin, G. Kim, A. Ng and D. Juncker, *Nature*, 2022, **605**, 464-469.
4. A. Parandakh, O. Ymbern, W. Jogia, J. Renault, A. Ng and D. Juncker, *Lab on a Chip*, 2023, **23**, 1547-1560.
